# Supplementary material for: Bis(2-pyridyl)ditellane as a precursor to CoII, CuI and CuII complex formation: structural characterization and photocatalytic studies
Source: Royal Society of Chemistry journal article supplement (doi:10.1039/d2nj02761e), 2022-01-01
Supplement: d2nj02761e1.pdf [file d2nj02761e1.pdf]

## New Journal of Chemistry

### *Supporting Information*

#### **Bis(2-pyridyl)ditellane as precursor to Co<sup>II</sup>, Cu<sup>I</sup> and Cu<sup>II</sup> complexes formation: structural characterization and photocatalytic studies**

Felipe Dornelles da Silva,<sup>a</sup> Tanize Bortolotto,<sup>a</sup> Bárbara Tirloni,<sup>a</sup> Natália de Freitas Daudt,<sup>b</sup> Ernesto Schulz Lang<sup>a</sup> and Roberta Cargnelutti\*<sup>a</sup>

<sup>a</sup> *Department of Chemistry, Federal University of Santa Maria, Av. Roraima, n.1000, 97105-900, Santa Maria, RS, Brazil.*

<sup>b</sup> *Department of Mechanical Engineering, Federal University of Santa Maria, Av. Roraima, n.1000, 97105-900, Santa Maria, RS, Brazil.*

\* *Corresponding author: roberta.cargnelutti@ufsm.br*

## Table of Contents

|                                                                                                                                                                                                                                                                                                   |    |
|---------------------------------------------------------------------------------------------------------------------------------------------------------------------------------------------------------------------------------------------------------------------------------------------------|----|
| <b>Table S1.</b> Crystallographic and structure refinement data for compounds <b>1–4</b> .....                                                                                                                                                                                                    | 03 |
| <b>Figure S1.</b> Thermal ellipsoid plot at the 50% probability level for the compound <b>1</b> .....                                                                                                                                                                                             | 04 |
| <b>Figure S2.</b> Thermal ellipsoid plot at the 50% probability level for the compound <b>2</b> .....                                                                                                                                                                                             | 04 |
| <b>Figure S3.</b> Thermal ellipsoid plot at the 50% probability level for the compound <b>3</b> .....                                                                                                                                                                                             | 04 |
| <b>Figure S4.</b> Thermal ellipsoid plot at the 50% probability level for the compound <b>4</b> . Symmetry code: #: 1 – x, y, 1/2 – z.....                                                                                                                                                        | 04 |
| <b>Figure S5.</b> FT-IR spectrum of bis(2-pyridyl)ditellane (2-PyTe) <sub>2</sub> .....                                                                                                                                                                                                           | 05 |
| <b>Figure S6.</b> FT-IR spectrum of [Co(2-Py <sub>2</sub> Te <sub>2</sub> -κN,N')Cl <sub>2</sub> ] ( <b>1</b> ).....                                                                                                                                                                              | 05 |
| <b>Figure S7.</b> FT-IR spectrum of [Co(2-Py <sub>2</sub> Te <sub>2</sub> -κN,N')Br <sub>2</sub> ] ( <b>2</b> ).....                                                                                                                                                                              | 06 |
| <b>Figure S8.</b> FT-IR spectrum of [Cu(2-Py <sub>2</sub> Te <sub>2</sub> -κN <sup>1</sup> ,Te <sup>2</sup> ,N <sup>2</sup> )Br <sub>2</sub> ] ( <b>3</b> ).....                                                                                                                                  | 06 |
| <b>Figure S9.</b> FT-IR spectrum of [Cu(2-Py <sub>2</sub> TeClO-κO,N,N')Cl <sub>2</sub> ] ( <b>4</b> ).....                                                                                                                                                                                       | 07 |
| <b>Figure S10.</b> Raman spectrum of [Co(2-Py <sub>2</sub> Te <sub>2</sub> -κN,N')Cl <sub>2</sub> ] ( <b>1</b> ).....                                                                                                                                                                             | 07 |
| <b>Figure S11.</b> Raman spectrum of [Co(2-Py <sub>2</sub> Te <sub>2</sub> -κN,N')Br <sub>2</sub> ] ( <b>2</b> ).....                                                                                                                                                                             | 08 |
| <b>Figure S12.</b> Raman spectrum of [Cu(2-Py <sub>2</sub> TeClO-κO,N,N')Cl <sub>2</sub> ] ( <b>4</b> ).....                                                                                                                                                                                      | 08 |
| <b>Figure S13.</b> Raman spectra of TiO <sub>2</sub> - <b>1</b> and TiO <sub>2</sub> - <b>2</b> .....                                                                                                                                                                                             | 09 |
| <b>Figure S14.</b> (a) Diffuse reflectance spectra of pure TiO <sub>2</sub> , TiO <sub>2</sub> - <b>1</b> and TiO <sub>2</sub> - <b>2</b> . (b) Absorption spectra obtained from reflectance values using Kubelka-Munk equation [ $F(R) = (1 - R)^2 / 2R$ ; R = reflectance] <sup>1</sup> . ..... | 10 |
| <b>Figure S15.</b> (a) Diffuse reflectance spectra of complexes <b>1-3</b> . (b) Absorption spectra obtained from reflectance values using Kubelka-Munk equation [ $F(R) = (1 - R)^2 / 2R$ ; R = reflectance] <sup>1</sup> .....                                                                  | 10 |
| <b>Figure S16.</b> Diffuse reflectance spectrum of [Cu(2-Py <sub>2</sub> TeClO-κO,N,N')Cl <sub>2</sub> ] ( <b>4</b> ).....                                                                                                                                                                        | 11 |
| <b>Figure S17.</b> Graphical determination of the E <sub>g</sub> value for [Co(2-Py <sub>2</sub> Te <sub>2</sub> -κN,N')Cl <sub>2</sub> ] ( <b>1</b> ).....                                                                                                                                       | 11 |
| <b>Figure S18.</b> Graphical determination of the E <sub>g</sub> value for [Co(2-Py <sub>2</sub> Te <sub>2</sub> -κN,N')Br <sub>2</sub> ] ( <b>2</b> ).....                                                                                                                                       | 11 |
| <b>Figure S19.</b> Graphical determination of the E <sub>g</sub> value for [Cu(2-Py <sub>2</sub> Te <sub>2</sub> -κN <sup>1</sup> ,Te <sup>2</sup> ,N <sup>2</sup> )Br <sub>2</sub> ] ( <b>3</b> ).....                                                                                           | 12 |
| <b>Figure S20.</b> Graphical determination of the E <sub>g</sub> value for [Cu(2-Py <sub>2</sub> TeClO-κO,N,N')Cl <sub>2</sub> ] ( <b>4</b> ).....                                                                                                                                                | 12 |
| <b>Figure S21.</b> Graphical determination of the E <sub>g</sub> value for TiO <sub>2</sub> - <b>1</b> .....                                                                                                                                                                                      | 12 |
| <b>Figure S22.</b> Graphical determination of the E <sub>g</sub> value for TiO <sub>2</sub> - <b>2</b> .....                                                                                                                                                                                      | 13 |
| <b>Figure S23.</b> Graphical determination of the E <sub>g</sub> value for pure TiO <sub>2</sub> synthesized by sol-gel method.....                                                                                                                                                               | 13 |
| <b>Figure S24.</b> EDS spectra of TiO <sub>2</sub> - <b>1</b> . The element Au comes from metallization process.....                                                                                                                                                                              | 13 |
| <b>Figure S25.</b> EDS spectra of TiO <sub>2</sub> - <b>2</b> . The element Au comes from metallization process.....                                                                                                                                                                              | 14 |
| <b>Figure S26.</b> SEM image of TiO <sub>2</sub> - <b>1</b> .....                                                                                                                                                                                                                                 | 14 |
| <b>Figure S27.</b> SEM image of TiO <sub>2</sub> - <b>2</b> .....                                                                                                                                                                                                                                 | 14 |
| <b>Figure S28.</b> EDS elemental mapping images of TiO <sub>2</sub> - <b>2</b> .....                                                                                                                                                                                                              | 15 |
| <b>Figure S29.</b> Cyclic voltammetry of complex <b>2</b> in CH <sub>2</sub> Cl <sub>2</sub> , containing 0.1 M of tetrabutylammonium hexafluorophosphate at 200 mV/s.....                                                                                                                        | 15 |
| <b>Figure S30.</b> A schematic illustration of electron transfer from the conduction band of complex <b>2</b> to the conduction band of titanium dioxide.....                                                                                                                                     | 16 |
| <b>Reference</b> .....                                                                                                                                                                                                                                                                            | 16 |

**Table S1.** Crystallographic and structure refinement data for compounds **1–4**.

| Compound                                                  | <b>1</b>                                                                        | <b>2</b>                                                                        | <b>3</b>                                                                                       | <b>4</b>                                                                                                      |
|-----------------------------------------------------------|---------------------------------------------------------------------------------|---------------------------------------------------------------------------------|------------------------------------------------------------------------------------------------|---------------------------------------------------------------------------------------------------------------|
| Formula                                                   | C <sub>10</sub> H <sub>8</sub> N <sub>2</sub> Cl <sub>2</sub> CoTe <sub>2</sub> | C <sub>10</sub> H <sub>8</sub> N <sub>2</sub> Br <sub>2</sub> CoTe <sub>2</sub> | C <sub>20</sub> H <sub>16</sub> Br <sub>2</sub> Cu <sub>2</sub> N <sub>4</sub> Te <sub>4</sub> | C <sub>20</sub> H <sub>16</sub> Cl <sub>4</sub> Cu <sub>2</sub> N <sub>4</sub> O <sub>2</sub> Te <sub>2</sub> |
| Mw (g·mol <sup>-1</sup> )                                 | 541.22                                                                          | 630.13                                                                          | 1109.68                                                                                        | 868.47                                                                                                        |
| Crystal system                                            | Monoclinic                                                                      | Orthorhombic                                                                    | Triclinic                                                                                      | Monoclinic                                                                                                    |
| Space group                                               | <i>P2<sub>1</sub>/n</i>                                                         | <i>Pbca</i>                                                                     | <i>P-1</i>                                                                                     | <i>C2/c</i>                                                                                                   |
| <i>a</i> (Å)                                              | 8.4278(6)                                                                       | 13.9956(5)                                                                      | 9.5162(4)                                                                                      | 20.7062(1)                                                                                                    |
| <i>b</i> (Å)                                              | 12.1230(9)                                                                      | 15.6522(7)                                                                      | 9.9462(4)                                                                                      | 8.3237(6)                                                                                                     |
| <i>c</i> (Å)                                              | 13.7530(9)                                                                      | 27.3451(9)                                                                      | 15.3597(5)                                                                                     | 14.6386(1)                                                                                                    |
| $\alpha$ (°)                                              | 90                                                                              | 90                                                                              | 99.9150(1)                                                                                     | 90                                                                                                            |
| $\beta$ (°)                                               | 92.779(2)                                                                       | 90                                                                              | 93.0890(1)                                                                                     | 94.930(3)                                                                                                     |
| $\gamma$ (°)                                              | 90                                                                              | 90                                                                              | 108.9570(1)                                                                                    | 90                                                                                                            |
| <i>V</i> (Å <sup>3</sup> )                                | 1403.49(2)                                                                      | 5990.3(4)                                                                       | 1344.97(9)                                                                                     | 2513.7(3)                                                                                                     |
| <i>Z</i>                                                  | 2                                                                               | 16                                                                              | 2                                                                                              | 8                                                                                                             |
| <i>D</i> <sub>calc</sub> (g·cm <sup>-3</sup> )            | 2.561                                                                           | 2.795                                                                           | 2.740                                                                                          | 2.295                                                                                                         |
| $\mu$ (mm <sup>-1</sup> )                                 | 5.656                                                                           | 10.280                                                                          | 8.821                                                                                          | 4.420                                                                                                         |
| Collected reflections                                     | 31771                                                                           | 120581                                                                          | 36615                                                                                          | 11837                                                                                                         |
| Independent reflections [ <i>R</i> <sub>int</sub> ]       | 4262 [0.0302]                                                                   | 7447 [0.0496]                                                                   | 8276 [0.0345]                                                                                  | 2780 [0.0414]                                                                                                 |
| <i>R</i> <sub>1</sub> / <i>wR</i> <sub>2</sub>            | 0.0176/0.0403                                                                   | 0.0379/0.0824                                                                   | 0.0304/0.0708                                                                                  | 0.0414/0.0989                                                                                                 |
| <i>R</i> <sub>1</sub> / <i>wR</i> <sub>2</sub> (all data) | 0.0190/0.0406                                                                   | 0.0507/0.0906                                                                   | 0.0452/0.0763                                                                                  | 0.0533/0.1027                                                                                                 |
| GOOF                                                      | 1.254                                                                           | 1.079                                                                           | 1.028                                                                                          | 1.209                                                                                                         |
| Largest diff. peak and hole (e·Å <sup>-3</sup> )          | 0.445 and -1.067                                                                | 1.017 and -1.254                                                                | 1.631 and -1.623                                                                               | 1.761 and -1.070                                                                                              |
| CCDC n°                                                   | 2168607                                                                         | 2168608                                                                         | 2168609                                                                                        | 2168610                                                                                                       |

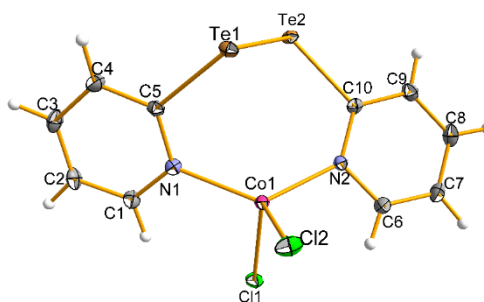

**Figure S1.** Thermal ellipsoid plot at the 50% probability level for the compound **1**.

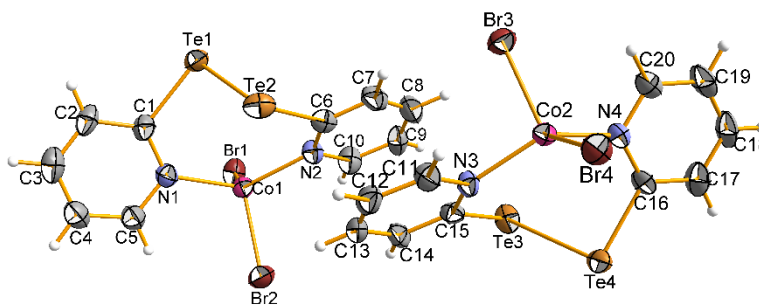

**Figure S2.** Thermal ellipsoid plot at the 50% probability level for the compound **2**.

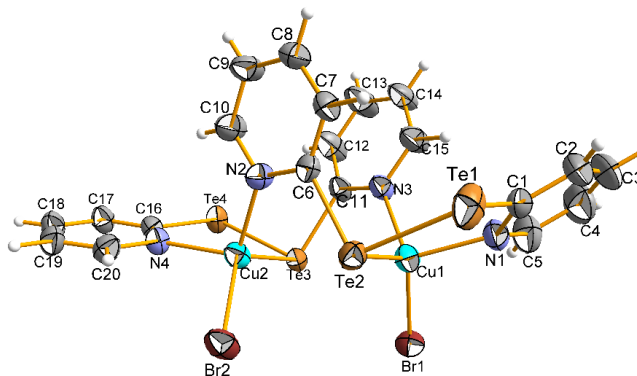

**Figure S3.** Thermal ellipsoid plot at the 50% probability level for the compound **3**.

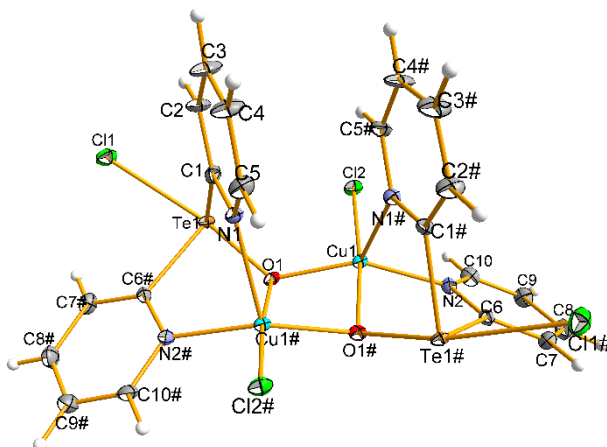

**Figure S4.** Thermal ellipsoid plot at the 50% probability level for the compound **4**. Symmetry code: #:  $1 - x, y, 1/2 - z$ .

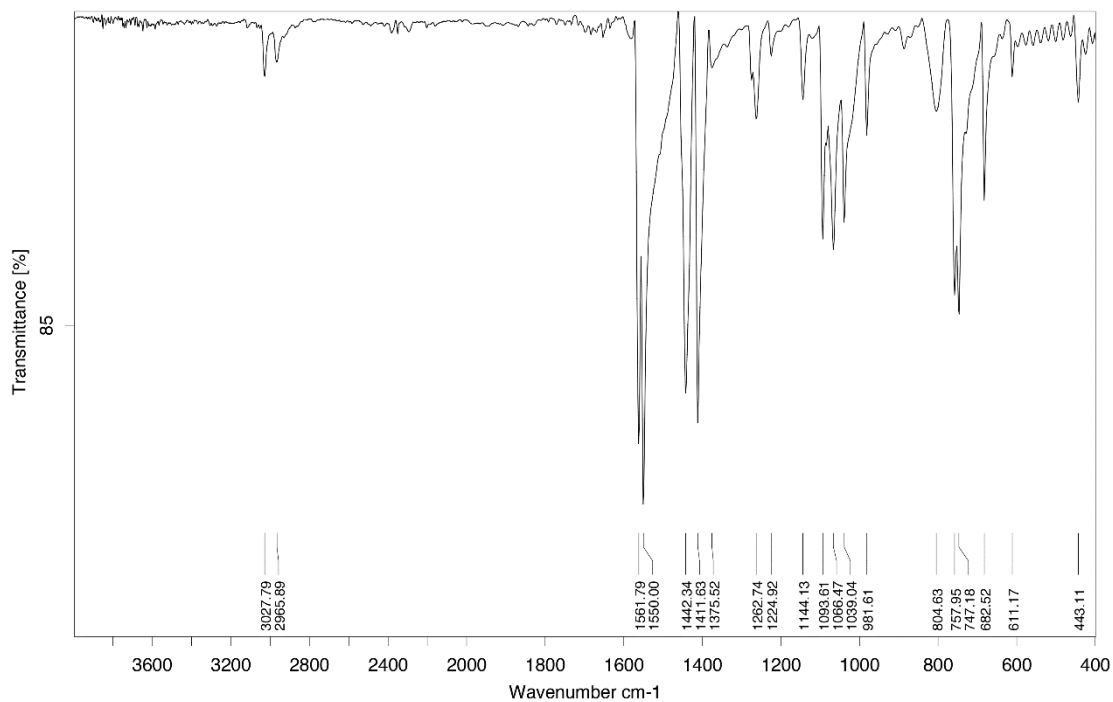

**Figure S5.** FT-IR spectrum of bis(2-pyridyl)ditellane (2-PyTe)<sub>2</sub>.

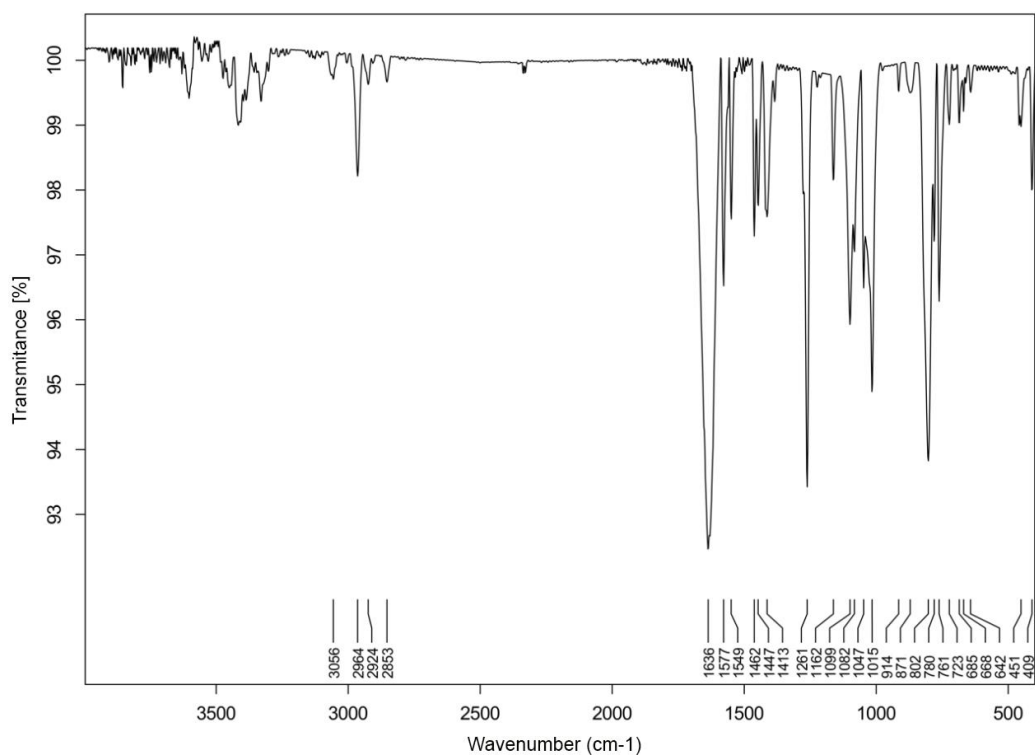

**Figure S6.** FT-IR spectrum of [Co(2-Py<sub>2</sub>Te<sub>2</sub>-κN,N')Cl<sub>2</sub>] (**1**).

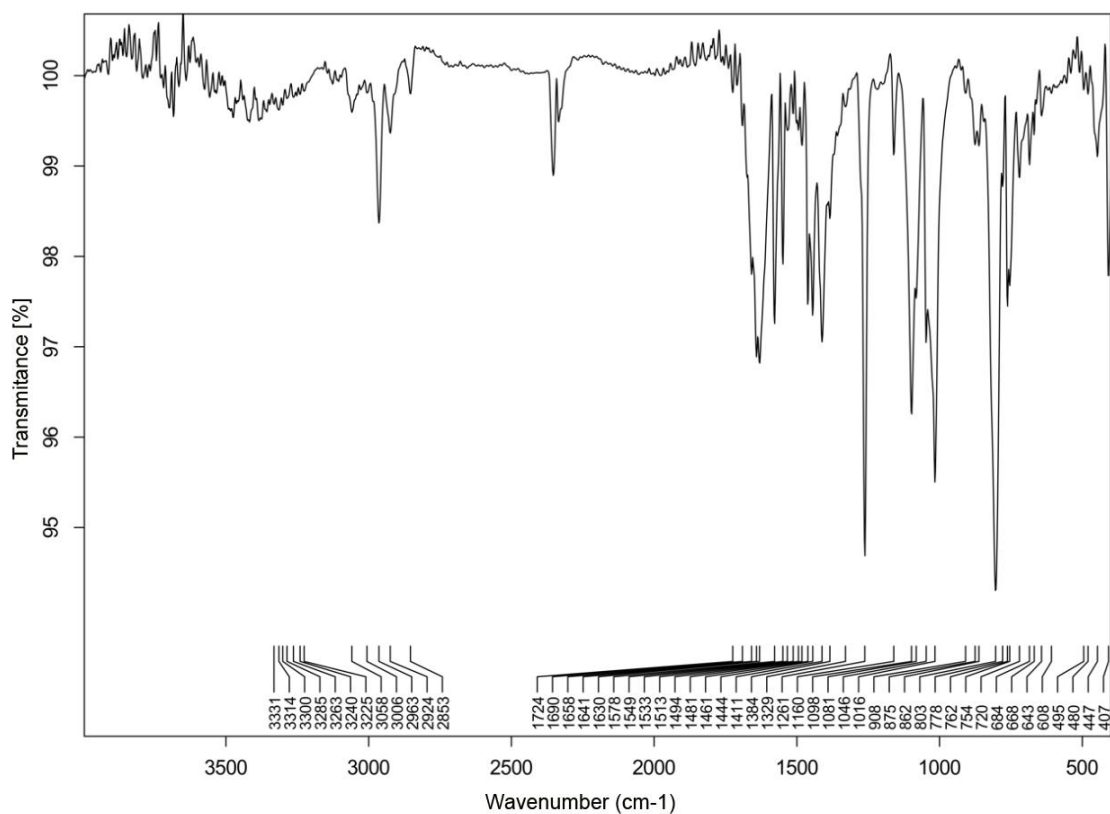

**Figure S7.** FT-IR spectrum of  $[\text{Co}(2\text{-Py}_2\text{Te}_2\text{-}\kappa\text{N},\text{N}')\text{Br}_2]$  (**2**).

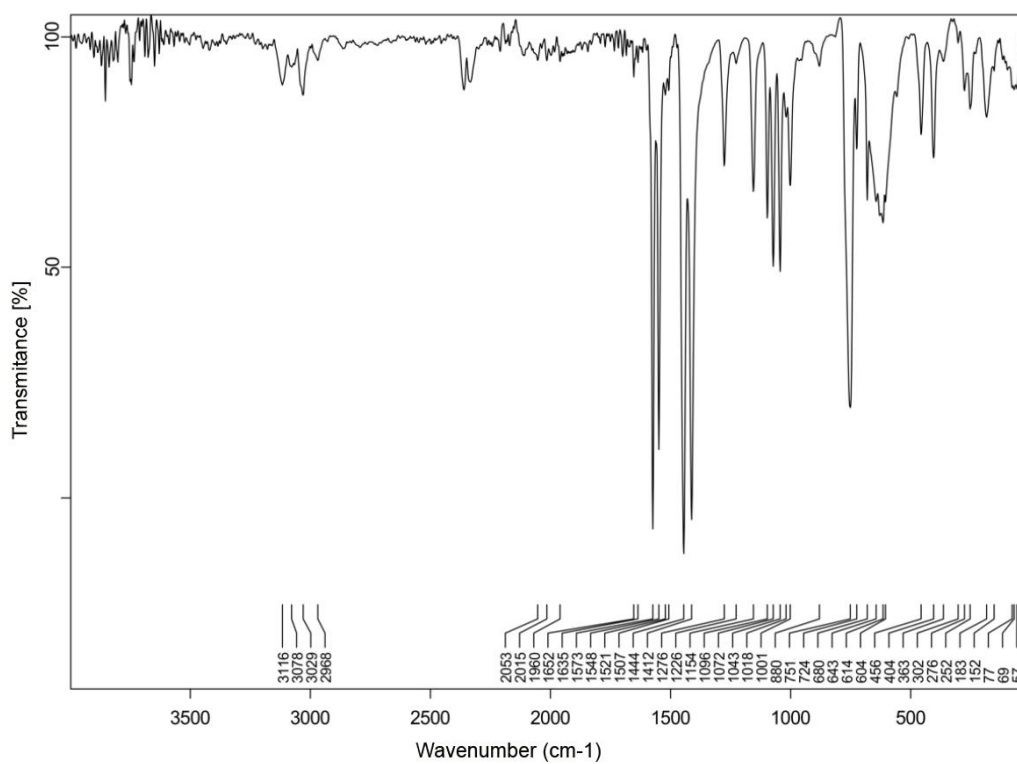

**Figure S8.** FT-IR spectrum of  $[\text{Cu}(2\text{-Py}_2\text{Te}_2\text{-}\kappa\text{N}^1,\text{Te}^2,\text{N}^2)\text{Br}_2]$  (**3**).

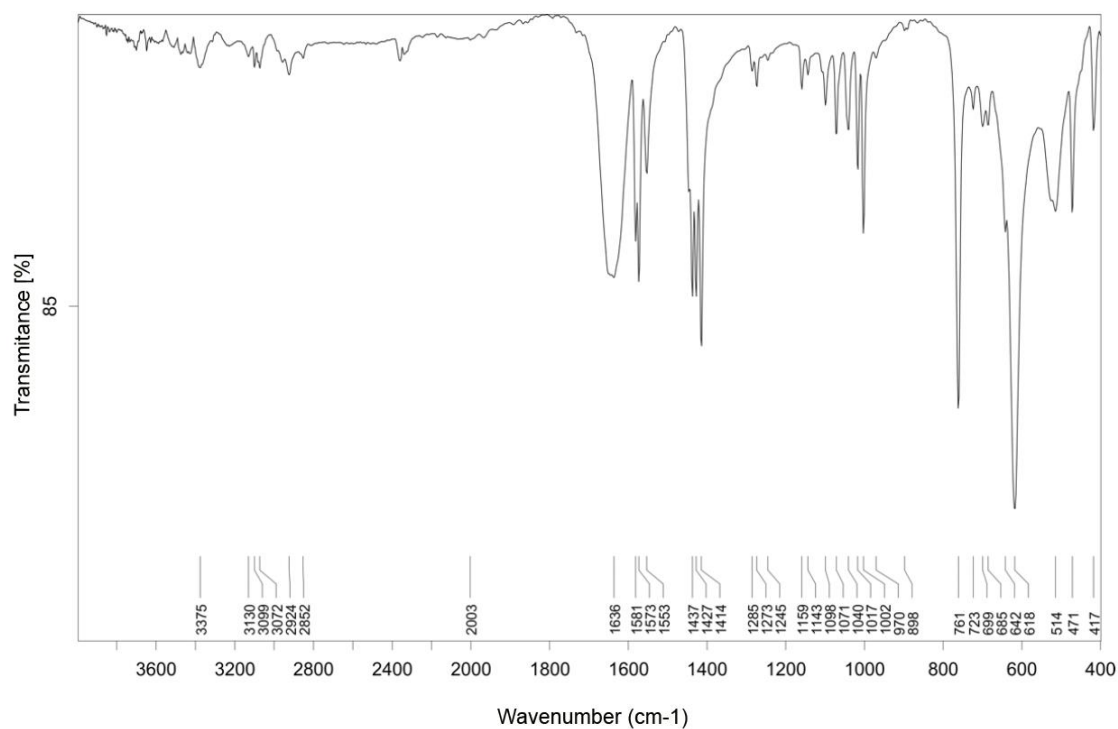

**Figure S9.** FT-IR spectrum of  $[\text{Cu}(2\text{-Py}_2\text{TeClO-}\kappa\text{O,N,N}')\text{Cl}]_2$  (**4**).

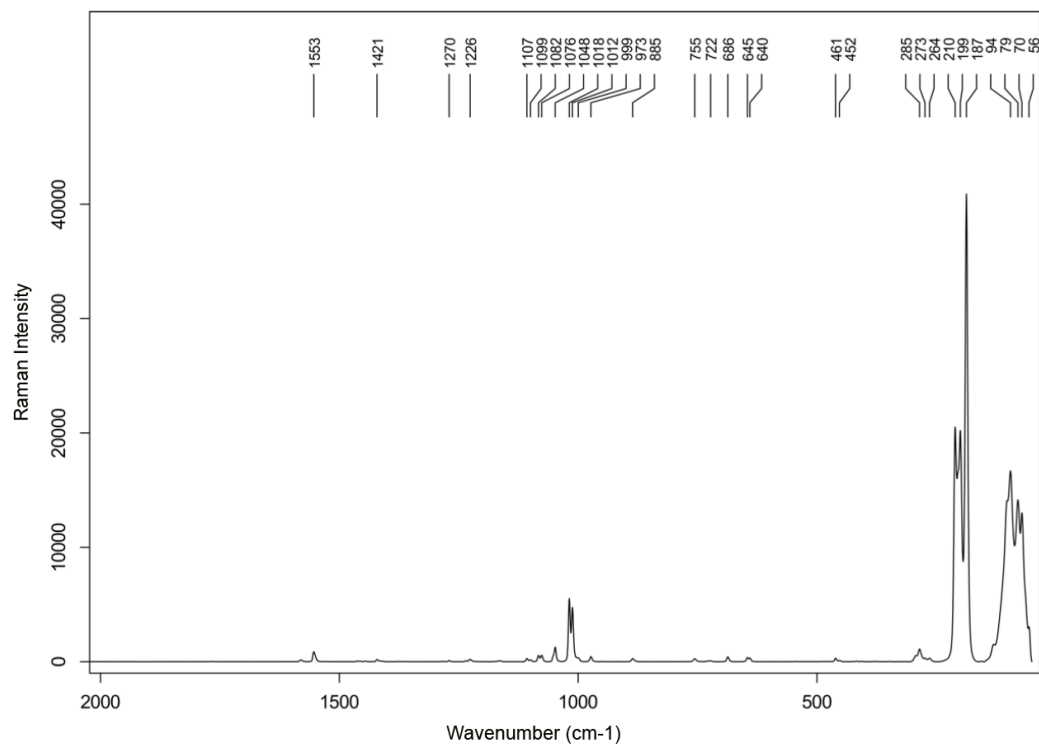

**Figure S10.** Raman spectrum of  $[\text{Co}(2\text{-Py}_2\text{Te}_2\text{-}\kappa\text{N,N}')\text{Cl}_2]$  (**1**).

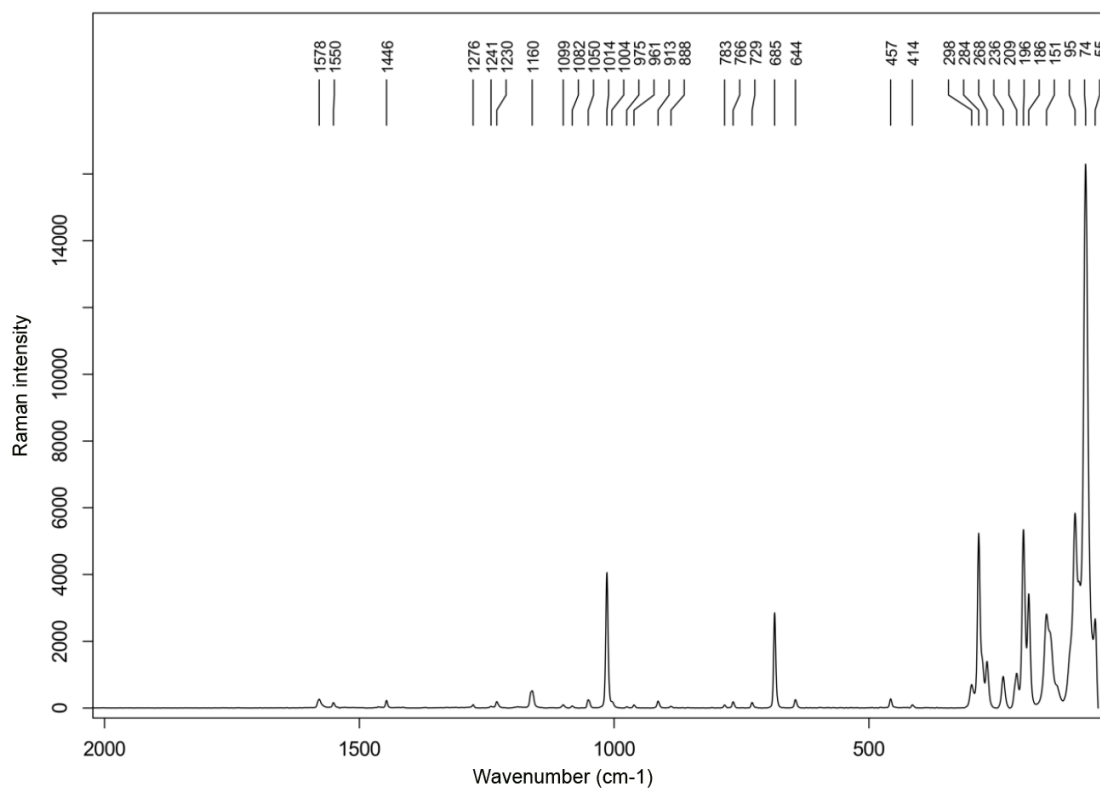

**Figure S11.** Raman spectrum of  $[\text{Co}(2\text{-Py}_2\text{Te}_2\text{-}\kappa\text{N,N}')\text{Br}_2]$  (**2**).

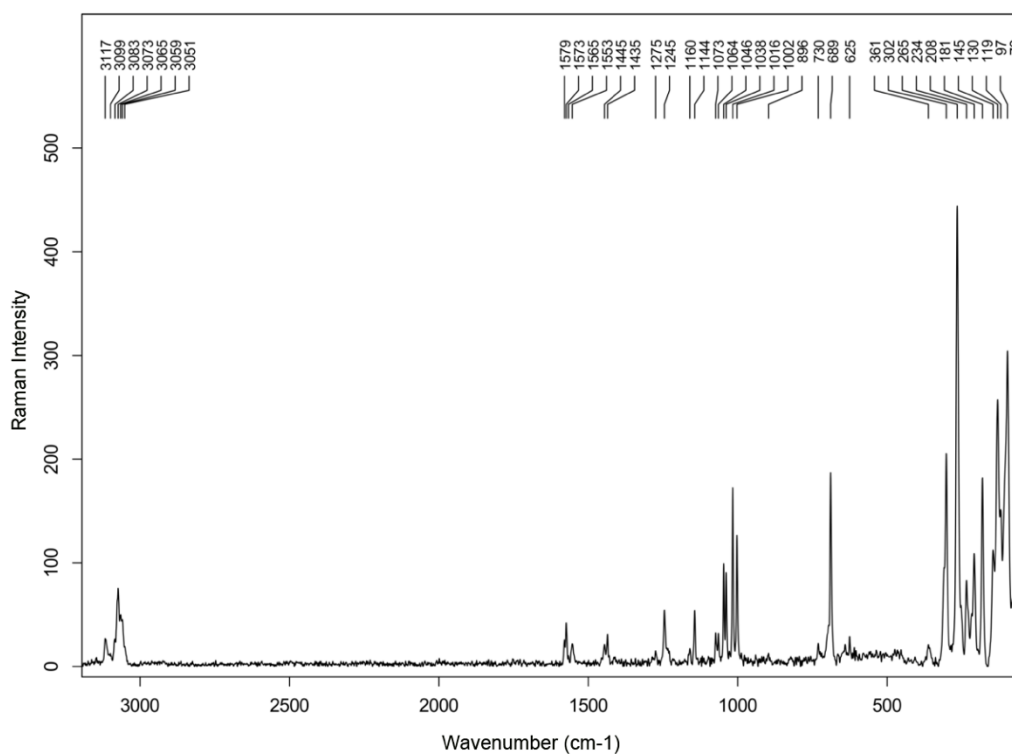

**Figure S12.** Raman spectrum of  $[\text{Cu}(2\text{-Py}_2\text{TeClO-}\kappa\text{O,N,N}')\text{Cl}]_2$  (**4**).



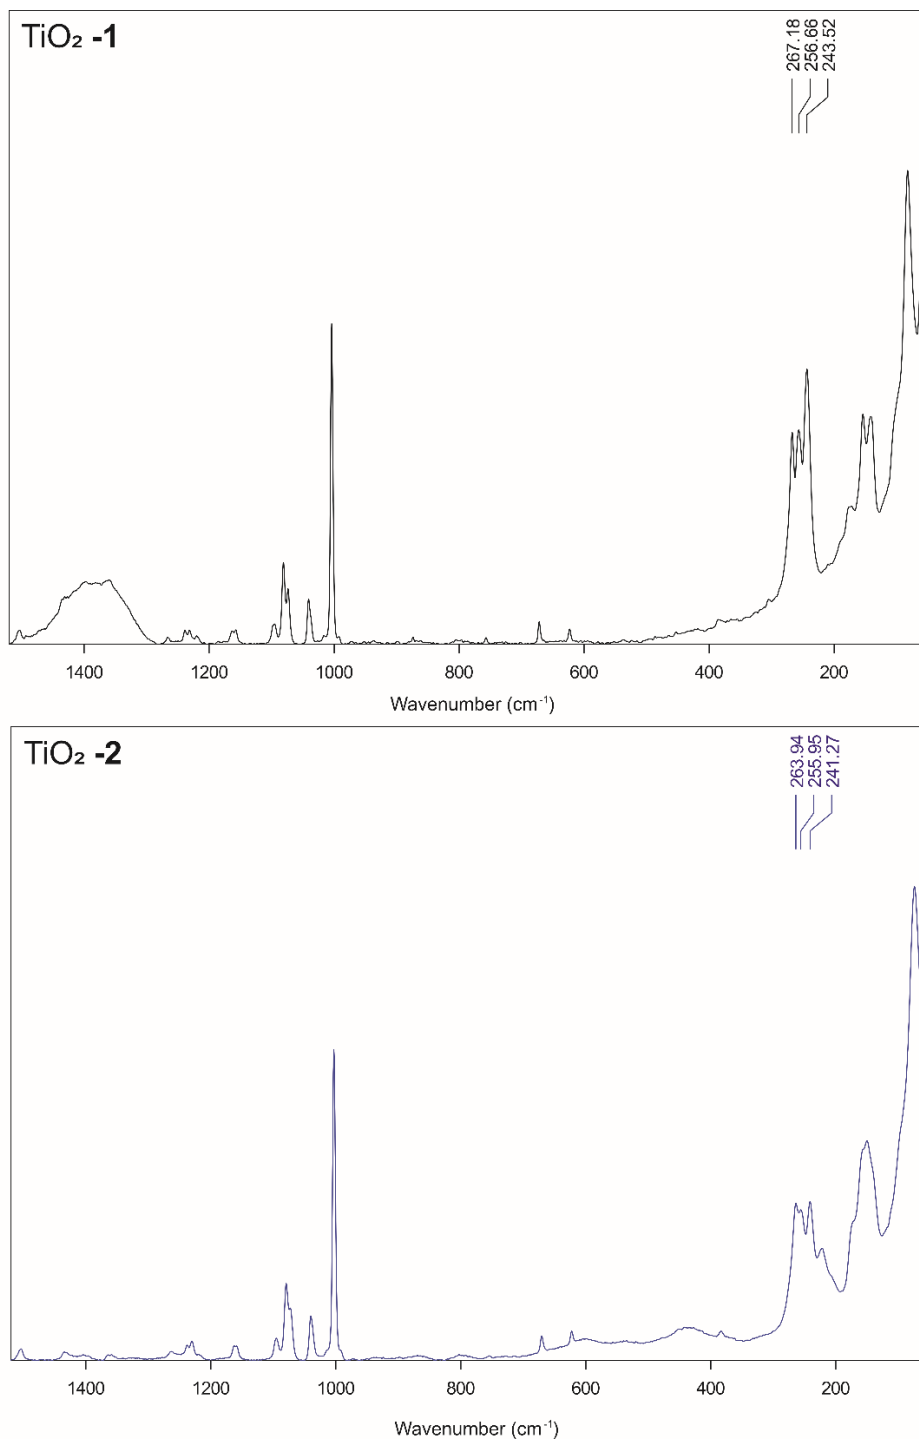

**Figure S13.** Raman spectra of TiO<sub>2</sub>-1 and TiO<sub>2</sub>-2.

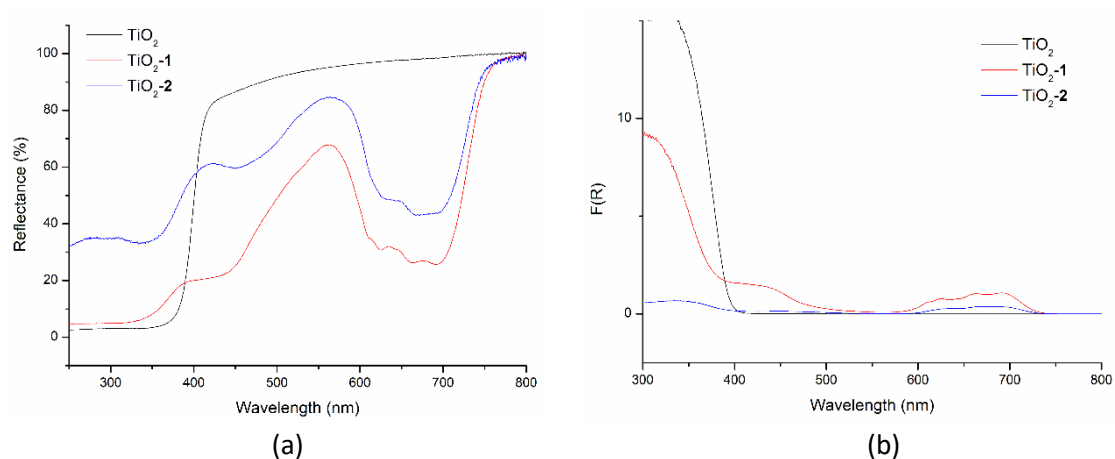

**Figure S14.** (a) Diffuse reflectance spectra of pure  $\text{TiO}_2$ ,  $\text{TiO}_2\text{-1}$  and  $\text{TiO}_2\text{-2}$ . (b) Absorption spectra obtained from reflectance values using Kubelka-Munk equation  $[F(R) = (1 - R)^2 / 2R; R = \text{reflectance}]^1$ . For the photocatalysts  $\text{TiO}_2\text{-1}$  and  $\text{TiO}_2\text{-2}$  it was observed some absorption in the visible region of the spectra, around 450 nm and 650 nm.

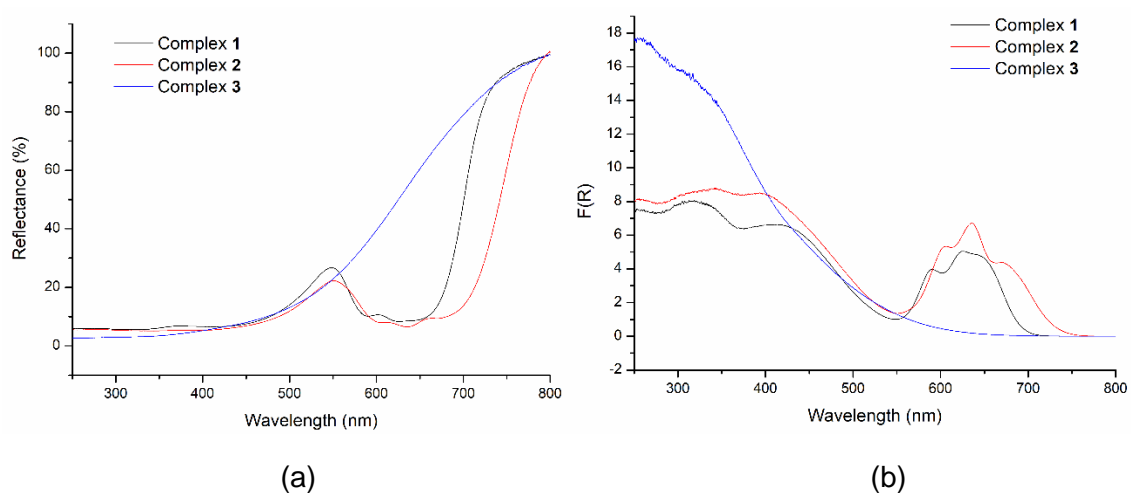

**Figure S15.** (a) Diffuse reflectance spectra of complexes **1-3**. (b) Absorption spectra obtained from reflectance values using Kubelka-Munk equation  $[F(R) = (1 - R)^2 / 2R; R = \text{reflectance}]^1$ . For the coordination compounds **1-3**, it was observed some absorption in the visible region of the spectra, around 400 nm and 650 nm.

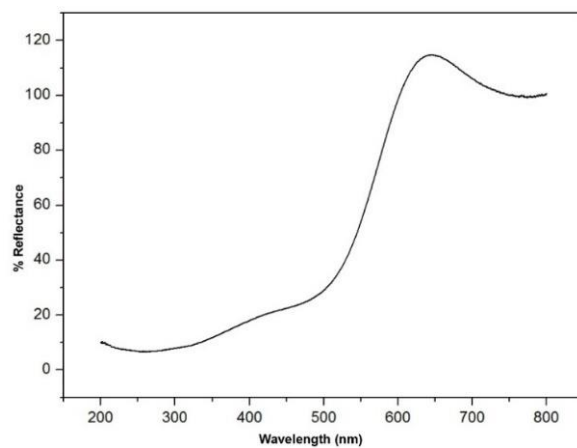

**Figure S16.** Diffuse reflectance spectrum of  $[\text{Cu}(2\text{-Py}_2\text{TeClO-}\kappa\text{O},\text{N},\text{N}')\text{Cl}]_2$  (**4**).

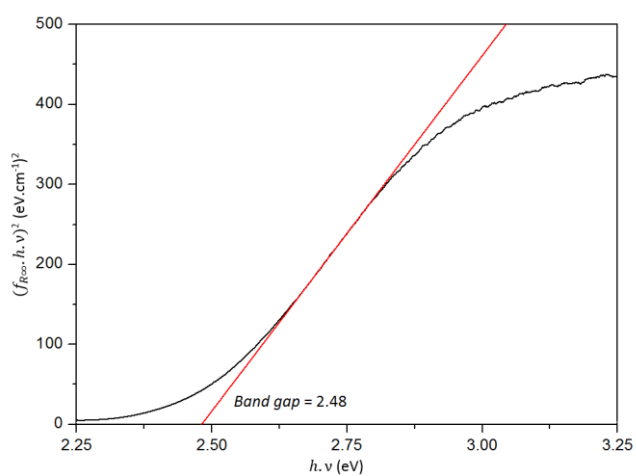

**Figure 17.** Graphical determination of the  $E_g$  value for  $[\text{Co}(2\text{-Py}_2\text{Te}_2\text{-}\kappa\text{N},\text{N}')\text{Cl}_2]$  (**1**).

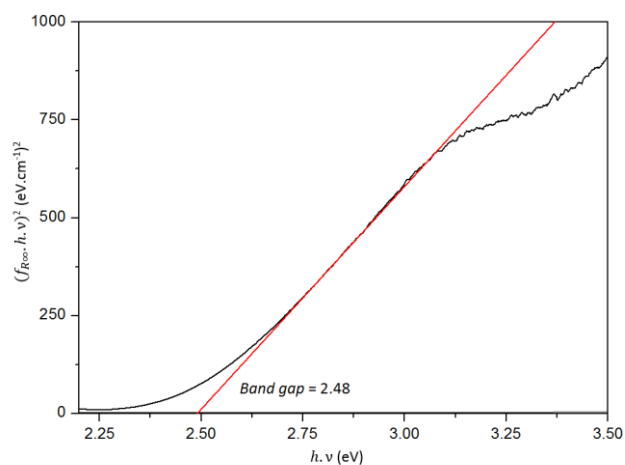

**Figure S18.** Graphical determination of the  $E_g$  value for  $[\text{Co}(2\text{-Py}_2\text{Te}_2\text{-}\kappa\text{N},\text{N}')\text{Br}_2]$  (**2**).

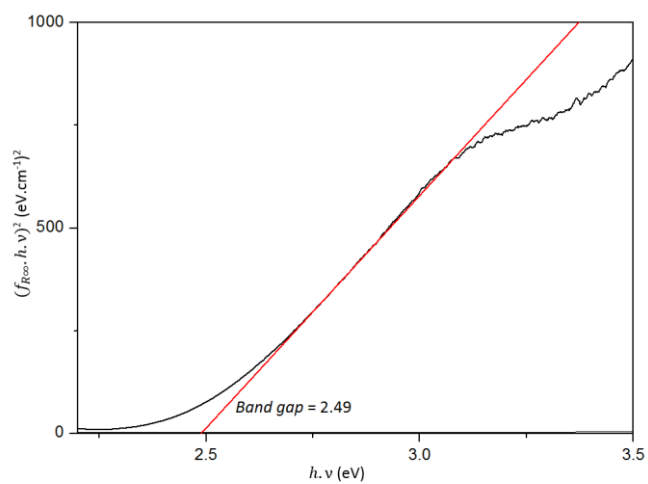

**Figure S19.** Graphical determination of the  $E_g$  value for  $[\text{Cu}(2\text{-Py}_2\text{Te}_2\text{-}\kappa\text{N}^1, \text{Te}^2, \text{N}^2)\text{Br}]_2$  (**3**).

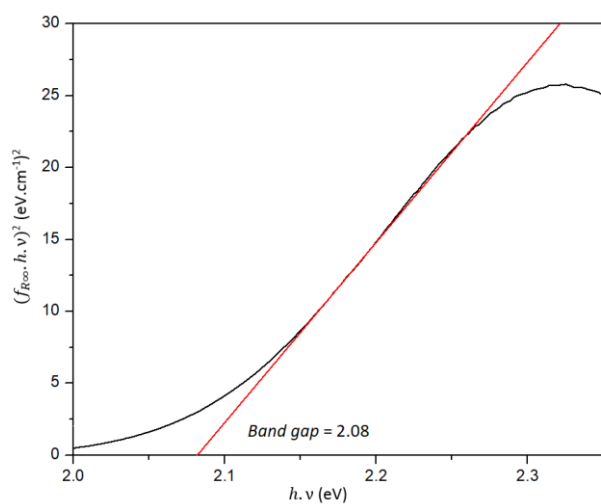

**Figure S20.** Graphical determination of the  $E_g$  value for  $[\text{Cu}(2\text{-Py}_2\text{TeClO-}\kappa\text{O}, \text{N}, \text{N}')\text{Cl}]_2$  (**4**).

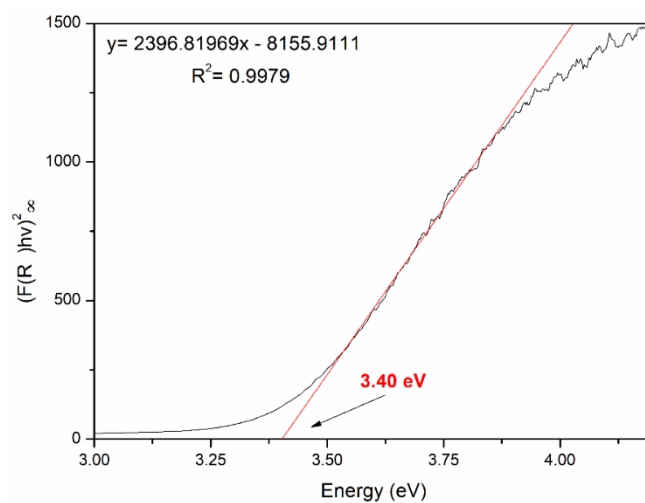

**Figure S21.** Graphical determination of the  $E_g$  value for  $\text{TiO}_2\text{-1}$ .

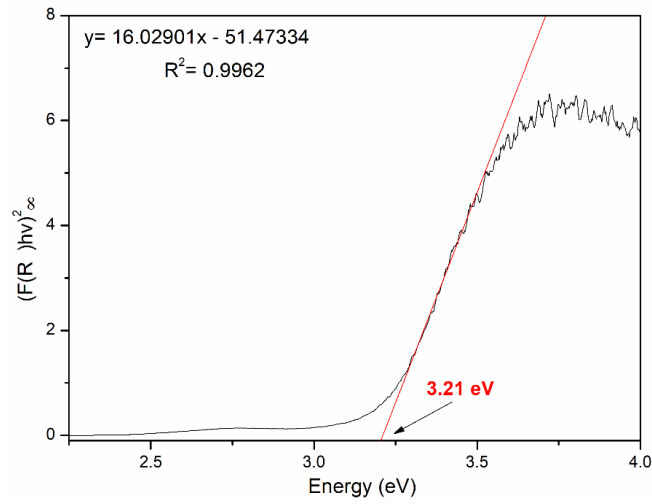

**Figure S22.** Graphical determination of the  $E_g$  value for  $\text{TiO}_2\text{-2}$ .

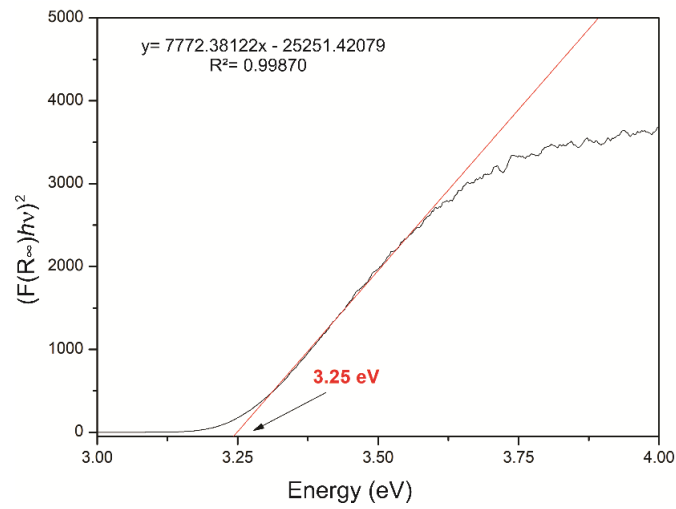

**Figure S23.** Graphical determination of the  $E_g$  value for pure  $\text{TiO}_2$  synthesized by sol-gel method.

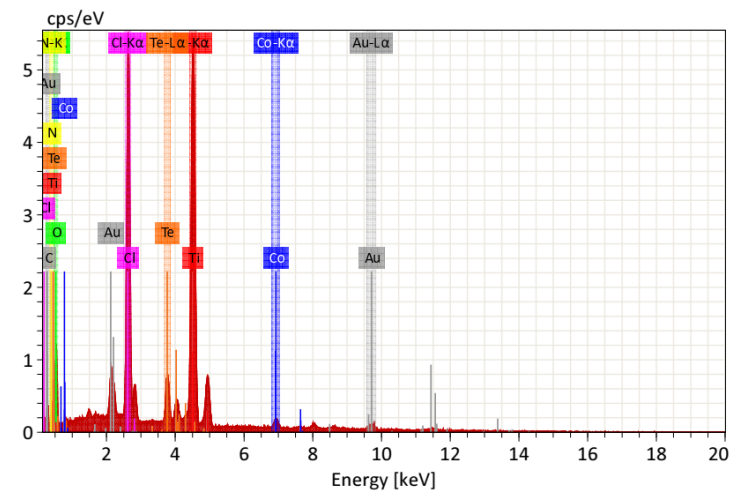

**Figure S24.** EDS spectrum of  $\text{TiO}_2\text{-1}$ . The element Au comes from metallization process.

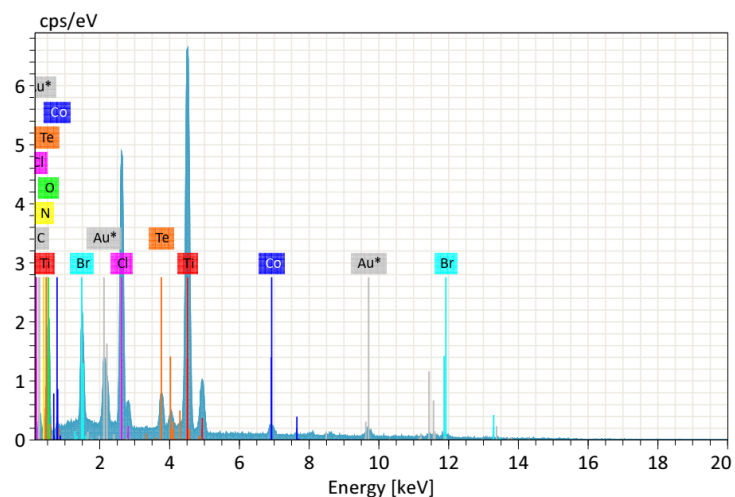

**Figure S25.** EDS spectrum of  $\text{TiO}_2\text{-2}$ . The element Au comes from metallization process.

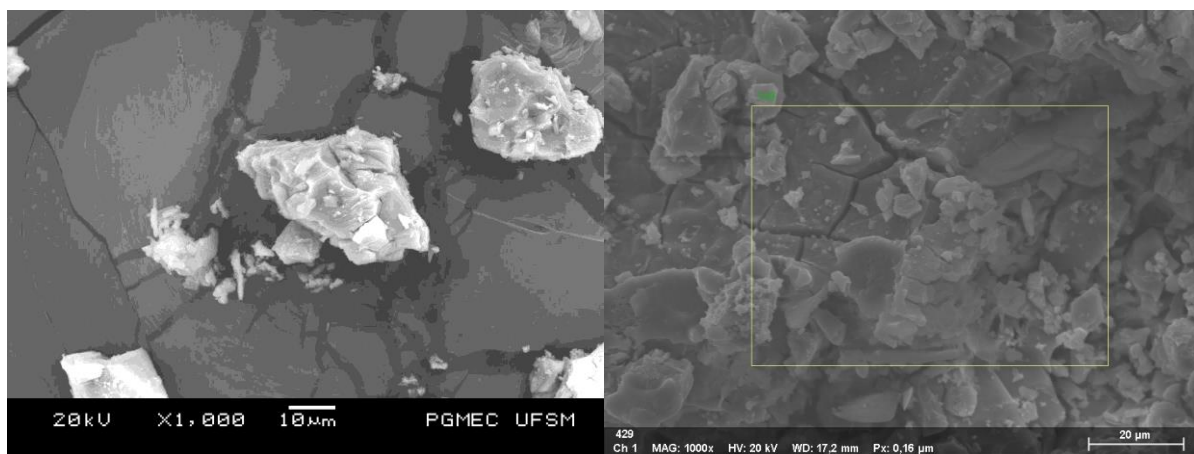

**Figure S26.** SEM image of  $\text{TiO}_2\text{-1}$ .

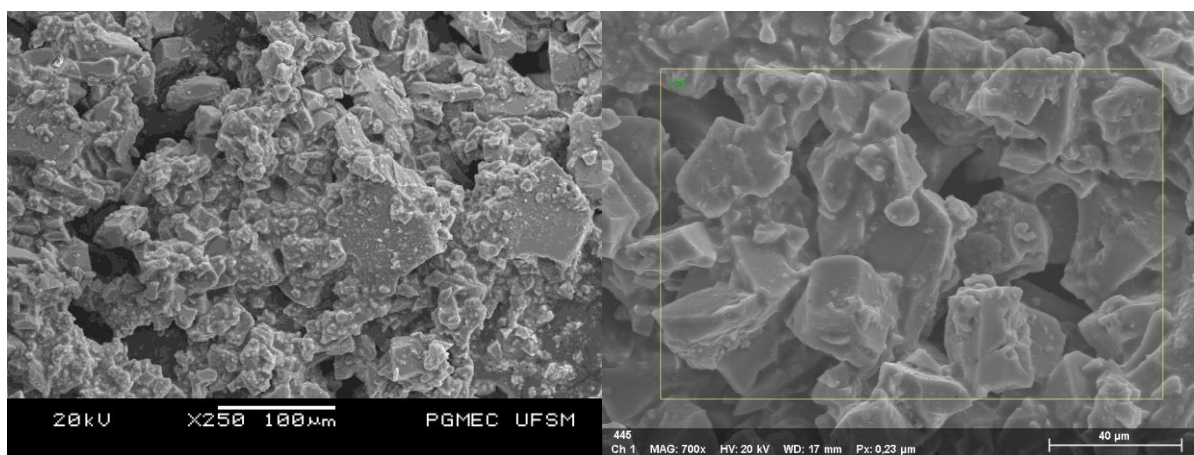

**Figure S27.** SEM image of  $\text{TiO}_2\text{-2}$ .

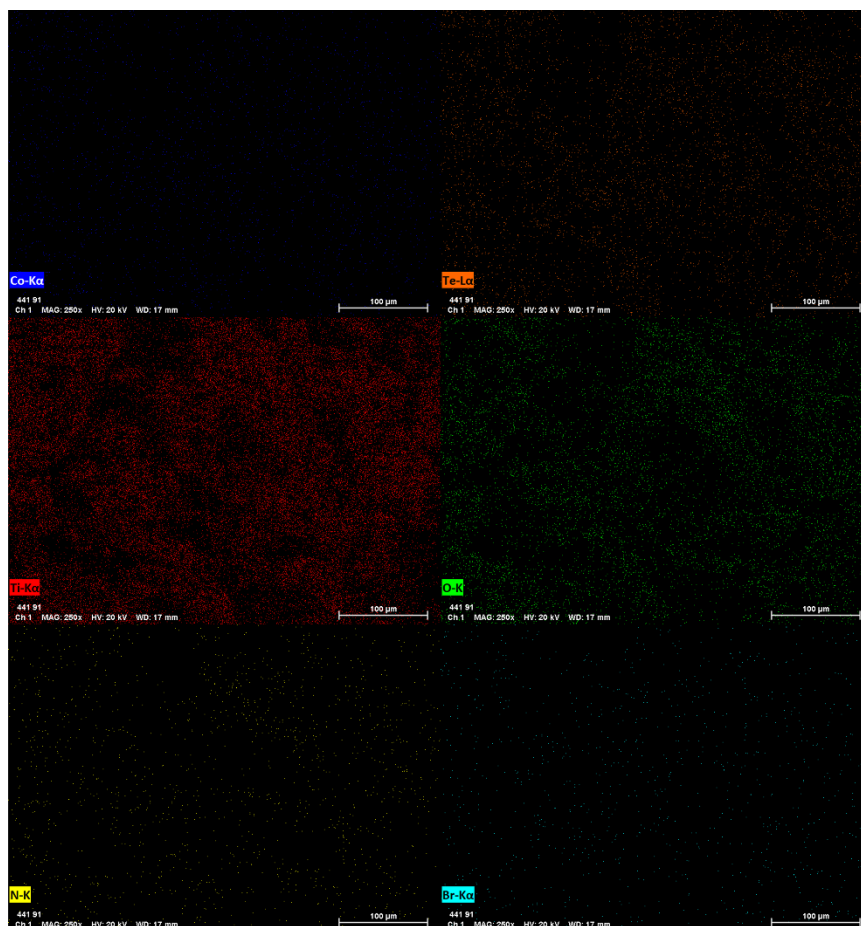

**Figure S28.** EDS elemental mapping images of TiO<sub>2</sub>-2.

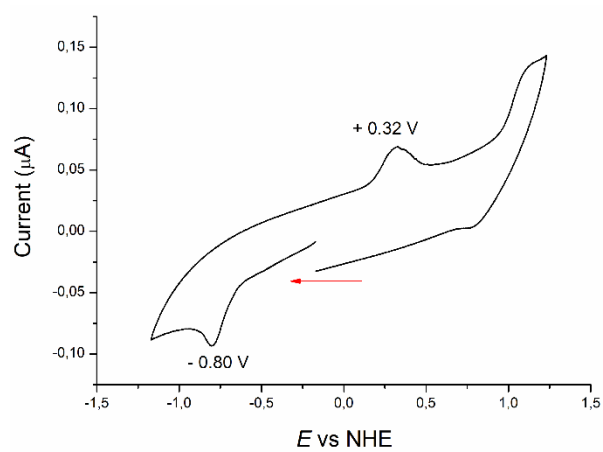

**Figure S29.** Cyclic voltammetry of complex **2** in CH<sub>2</sub>Cl<sub>2</sub>, containing 0.1 M of tetrabutylammonium hexafluorophosphate at 200 mV/s.

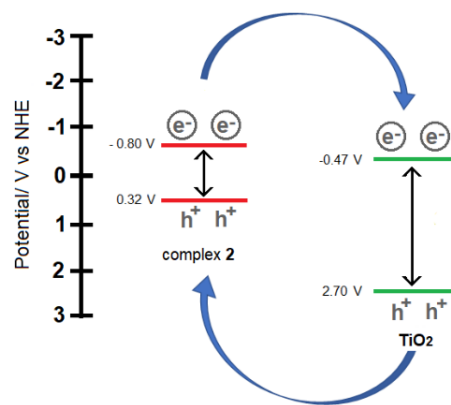

**Figure S30.** A schematic illustration of electron transfer from the conduction band of complex **2** to the conduction band of titanium dioxide.

## Reference

- [1] N. Singhal, R. Chakraborty, P. Ghosh and A. Nag, *Chem. Asian J.* 2018, **13**, 2085 – 2092.
